# Supplementary material for: Electron deficient oxygen species in highly OER active iridium anodes characterized by X-ray absorption and emission spectroscopy
Source: Royal Society of Chemistry journal article supplement (doi:10.1039/d4cp03415e), 2025-01-01
Supplement: d4cp03415e1.pdf [file d4cp03415e1.pdf]

### Supplementary material for the manuscript:

#### Electron deficient oxygen species in highly OER active iridium anodes characterized by X-ray absorption and emission spectroscopy

We measured absorption at the O *K*-edges of rutile-type IrO<sub>2</sub> and amorphous-Ir-O<sub>x</sub> at the BACH beamline at Elettra to provide a high resolution reference, Figure A1. These measurements were performed in fluorescence yield mode to provide bulk sensitive information. The resonance at 529 eV at III in the amorphous-IrO<sub>x</sub> can be clearly distinguished from the 530 eV resonance at IV.

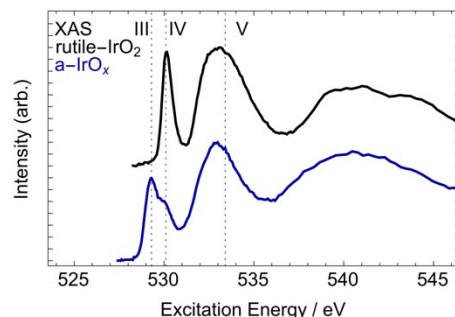

**Figure S1:** O *K*-edge XA spectrum measured in fluorescence yield at the BACH beamline. The spectra have been normalized at 546 eV.
